# Supplementary material for: Parked and Operating Loads Analysis in the Aerodynamic Design of Multi-megawatt-scale Floating Vertical Axis Wind Turbines
Source: Copernicus journal article supplement (doi:10.5194/wes-2021-60), 2021-06-22
Supplement: Supplementary file [file wes-2021-60-AC1-supplement.pdf]

**Title: Parked and Operating Loads Analysis in the Aerodynamic Design of Multi-megawatt-scale Floating Vertical Axis Wind Turbines [<https://doi.org/10.5194/wes-2021-60>]**

**Author(s): Mohammad Sadman Sakib and D. Todd Griffith**

Thank you for your feedback which is extremely helpful. The author responses ([in blue](#)) to the reviewer comments (in black) [are noted below](#).

The manuscript deals with the analysis of multi-megawatt-scale floating Darrieus-type vertical axis wind turbines. Both parked and operating conditions are evaluated by means of performance (i.e., power extraction) and rotor-averaged aerodynamic loads. A 3D vortex model was used to perform the simulations. Different design configurations were analyzed, with variations in number of blades, aspect ratios (ratios of rotor height and diameter), and blade tapering towards the blade ends. During the design variations with respect to the number of blades and aspect ratios, the authors took care not to modify the rotor solidity and Reynolds numbers, which yields clear conclusions that are affected by one parameter only and not a mixture of parameters as was done by other authors before.

[Response: Thank you for your comments which are greatly appreciated.](#)

### **General Comments**

The manuscript is generally written in a clear and concise manner and well organized. The ideas and messages are clearly formulated and the overall story-telling is very good. Here and there, a nice systems engineering view shines through that is very appealing. The topic of the manuscript is generally relevant for the wind energy research community. The methods for the description of the turbine aerodynamics are appropriate for a design space analysis. The results are interesting and allow for clear conclusions provided at the end of the manuscript. There are just a few specific comments and technical corrections that should be addressed before final acceptance of the manuscript, which are given below.

[Response: Thank you again for your valuable feedback. We have tried our best to respond your specific comments as below.](#)

### **Specific Comments**

In the introduction, there are a number of self-citations which yields the impression that there are no other research groups working in the field of vertical axis wind turbines. The authors may find additional references to broaden the view on available literature. Also, the authors state that “various floating VAWT concepts have been proposed” (p. 2, l. 36), but give only two examples. The authors may give additional references to existing concepts.

[Response: The authors acknowledge the fact that there are several other research teams working on interesting problems related to VAWTs. We addressed this issue in the revised manuscript by including additional references to ongoing VAWT work and different floating VAWT concepts proposed, as noted on Page 1 Line 20-24 and Page 2 Line 38-39.](#)

The authors evaluate loads in a rotor-averaged manner, i.e., rotor thrust and lateral forces are analyzed. It would be interesting to see the difference in local loads on the blades depending on the variation of design parameters, e.g., by means of blade root bending moments. A respective extension would be appreciated, as it would allow for implications for structural blade design, which in turn would also underline the systems engineering view visible in some parts of the manuscript.

The authors agree that more discussion of aerodynamic design and loads and its implications on other aspects of the systems engineering like structural design would greatly benefit the manuscript. Such additions are made as mentioned: Page 14 Line (256-261), Page 18 Line (332-340), and Page 23 Line (405-408).

On page 12, at the end of the first paragraph, the authors list the simplifications and limitations of the model applied for the calculation of standstill situations, which is good. However, these seem quite numerous, and it is not entirely clear enough why they have been included. The authors should thus elaborate on the necessity to consider the simplifications.

Response: The parked loads or standstill loads can be a major concern in VAWTs. The model implemented in this work has some limitations like no wake effect consideration and one blade element does not affect another but these are reasonable assumptions for standstill loading analysis. These assumptions may result in some discrepancies in experimental and simulated loads and as a result, the simplifications and limitations have been explicitly highlighted on Page 12, Line 225-229. It is important to note that as a lot of design iterations have to be completed in the initial stage of turbine design this vortex-based model proves very useful and also serves as a good numerical tool for rotor parameter optimization too.

The argumentation on page 12, 3rd paragraph, is weak. What differences in the overall theory behind the calculation of parked loads are the reason for the differences in the overall shape of the profiles? Please be more specific.

Response: Ottermo et al. (2012) manuscript details the simplified relation used between standstill thrust loading and wind velocity which is shown below.

$$F(\theta) = \frac{S\rho v^2}{2N} \sum_i C_D(\theta + \frac{2\pi i}{N} + \alpha)$$

Here S is Blade area, v is wind speed, N is number of blades, i =1, 2 ...N is the blade label, C<sub>D</sub> is drag coefficient and  $\theta$  is azimuth angle. It is clearly seen that in the equation thrust load is only a function of drag coefficient and the azimuth angle and does not take into account the lift coefficient (C<sub>L</sub>). In actuality thrust loads are function of both normal and tangential load components which are in turn functions of lift and drag coefficients. These lift and drag coefficients are obtained based on the nominal angle of attack of blade elements which is again a function of normal and tangential components of velocity. In the current study the thrust and lateral loads are functions of both C<sub>L</sub> and C<sub>D</sub> which results in difference of shape of profiles.

### Technical Corrections

Please avoid unnecessary abbreviations in the abstract (N, AR, H, D). The authors should further consider restructuring section 2. Subsections and subsubsections may not be necessary, if there is only one subsection and subsubsection.

Response: We have removed the abbreviations from the abstract. Section 2 is restructured to contain only two subsections rather than one subsection and one subsubsection.
